# Supplementary material
Source: PubMed Central journal article supplement (PMC3248991)

## Supporting Information

### Hoiamide D, a marine cyanobacteria-derived inhibitor of p53/MDM2 interaction

Karla L. Malloy<sup>a,b,†</sup>, Hyukjae Choi<sup>a,b,†</sup>, Catherine Fiorill<sup>c</sup>, Fred A. Valeriote<sup>d</sup>, Teatulohi  
Matainaho<sup>e</sup>, and William H. Gerwick<sup>a,b,\*</sup>

<sup>a</sup> Center for Marine Biotechnology and Biomedicine, Scripps Institution of Oceanography,  
University of California at San Diego, La Jolla, California 92093,

<sup>b</sup> Skaggs School of Pharmacy and Pharmaceutical Sciences, University of California at San  
Diego, La Jolla, California 92093,

<sup>c</sup> Novartis Institutes of Biomedical Research, Cambridge, Massachusetts 02139,

<sup>d</sup> Henry Ford Health System, Department of Internal Medicine, Josephine Ford Cancer Center,  
Detroit, MI 48202,

<sup>e</sup> Discipline of Pharmacology, School of Medicine and Health Sciences, University of Papua  
New Guinea, National Capital District, Papua New

S1: <sup>1</sup>H NMR spectrum of **1** (500 MHz, DMSO)

S2: <sup>1</sup>H NMR spectrum of **2** (600 MHz, DMSO)

S3: <sup>13</sup>C NMR spectrum of **1** (75 MHz, DMSO)

S4: <sup>13</sup>C NMR spectrum of **2** (75 MHz, DMSO)

S5: COSY spectrum of **1** (DMSO)

- S6: COSY spectrum of **2** (DMSO)
- S7: TOCSY spectrum of **1** (DMSO)
- S8: TOCSY spectrum of **2** (DMSO)
- S9: HSQC spectrum of **1** (DMSO)
- S10: HSQC spectrum of **2** (DMSO)
- S11: HMBC spectrum of **1** (DMSO)
- S12: HMBC spectrum of **2** (DMSO)
- S13:  $^1\text{H}$  NMR spectrum of protonated **1** (500 MHz, DMSO)
- S14:  $^{13}\text{C}$  NMR spectrum of protonated **1** (75 MHz, DMSO)
- S15:  $^{13}\text{C}$  NMR spectrum of Hoiamide A hydrolysate (75 MHz, DMSO)

S1: <sup>1</sup>H NMR spectrum of 1 (500 MHz, DMSO)

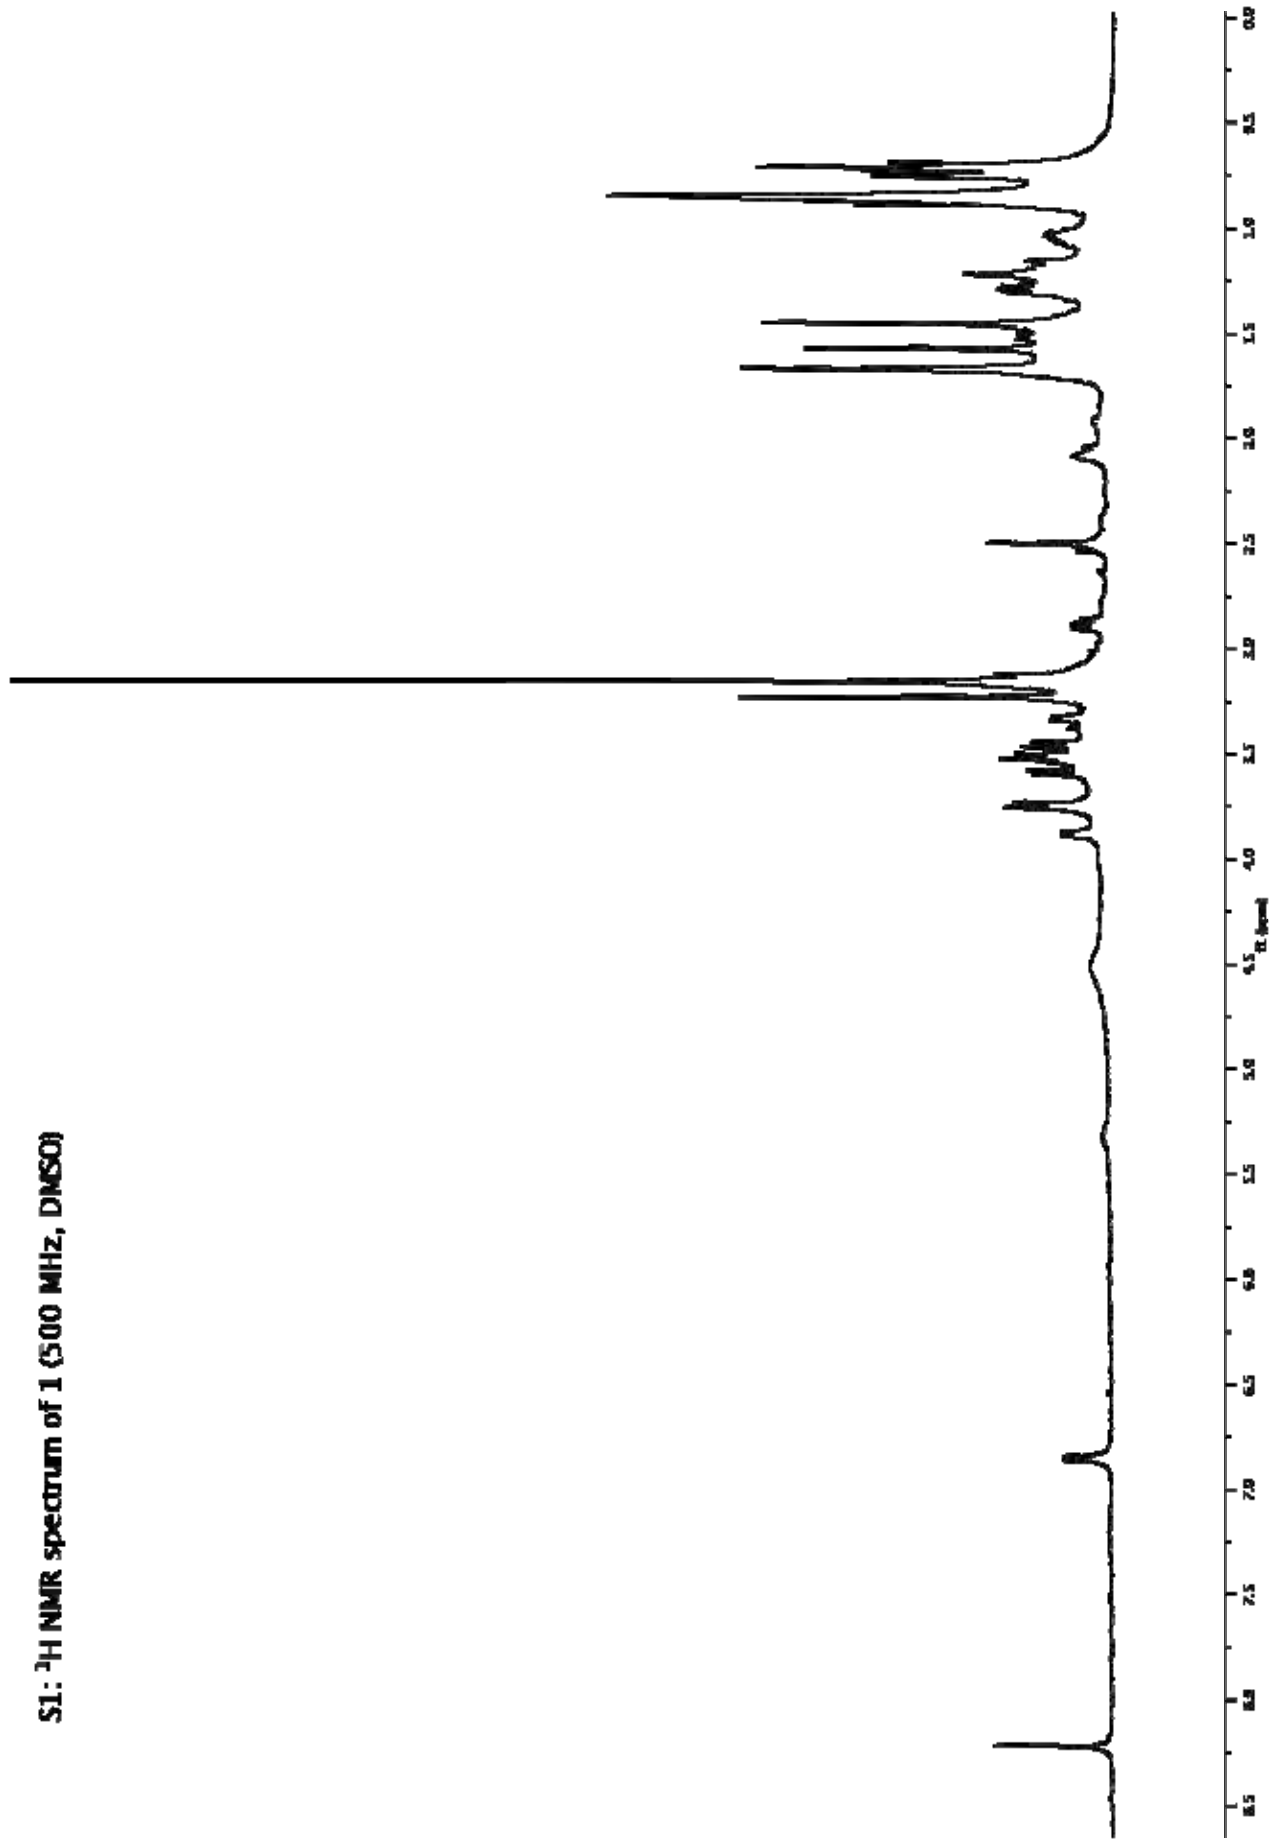

S2: <sup>1</sup>H NMR spectrum of 2 (600 MHz, DMSO)

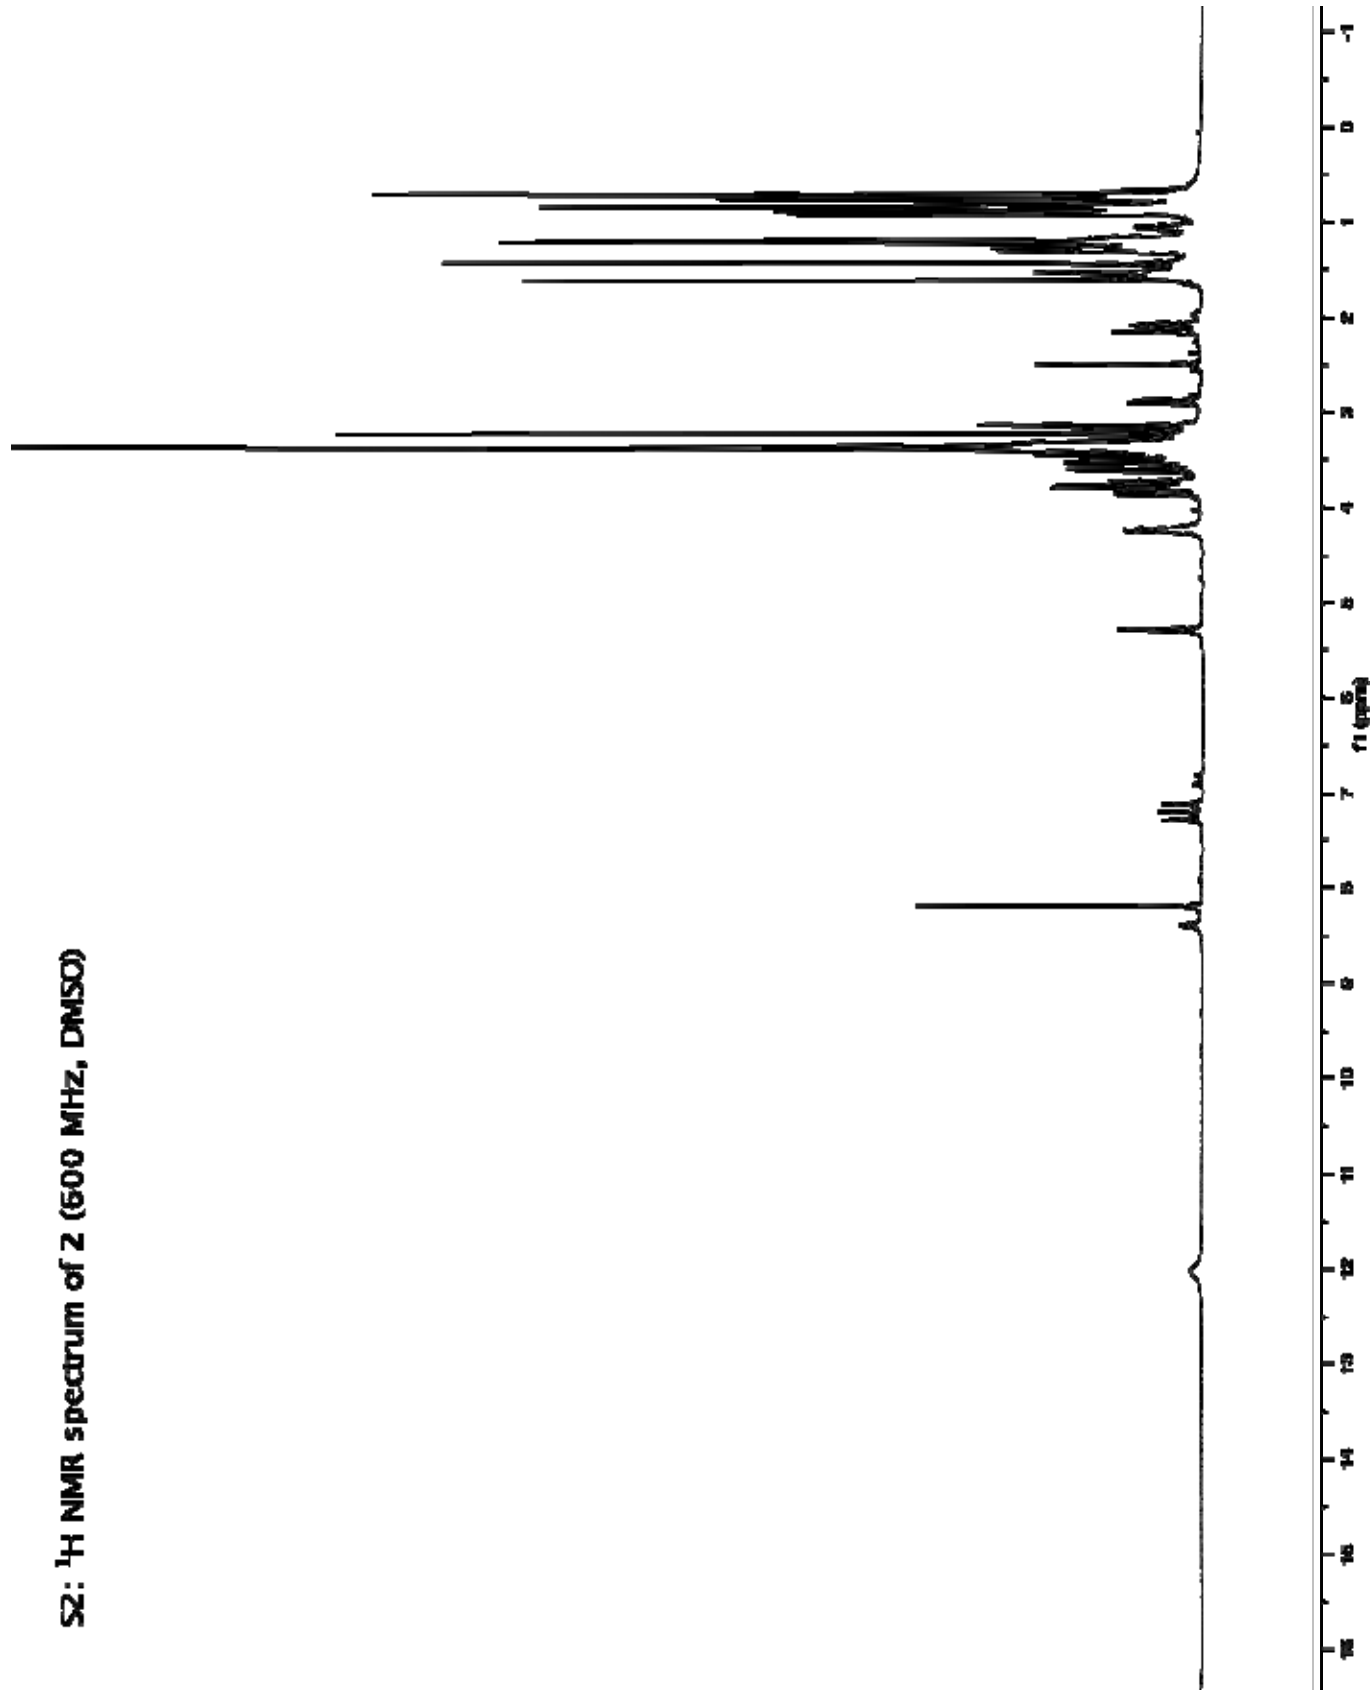

S3:  $^{13}\text{C}$  NMR spectrum of 1 (300 MHz, DMSO)

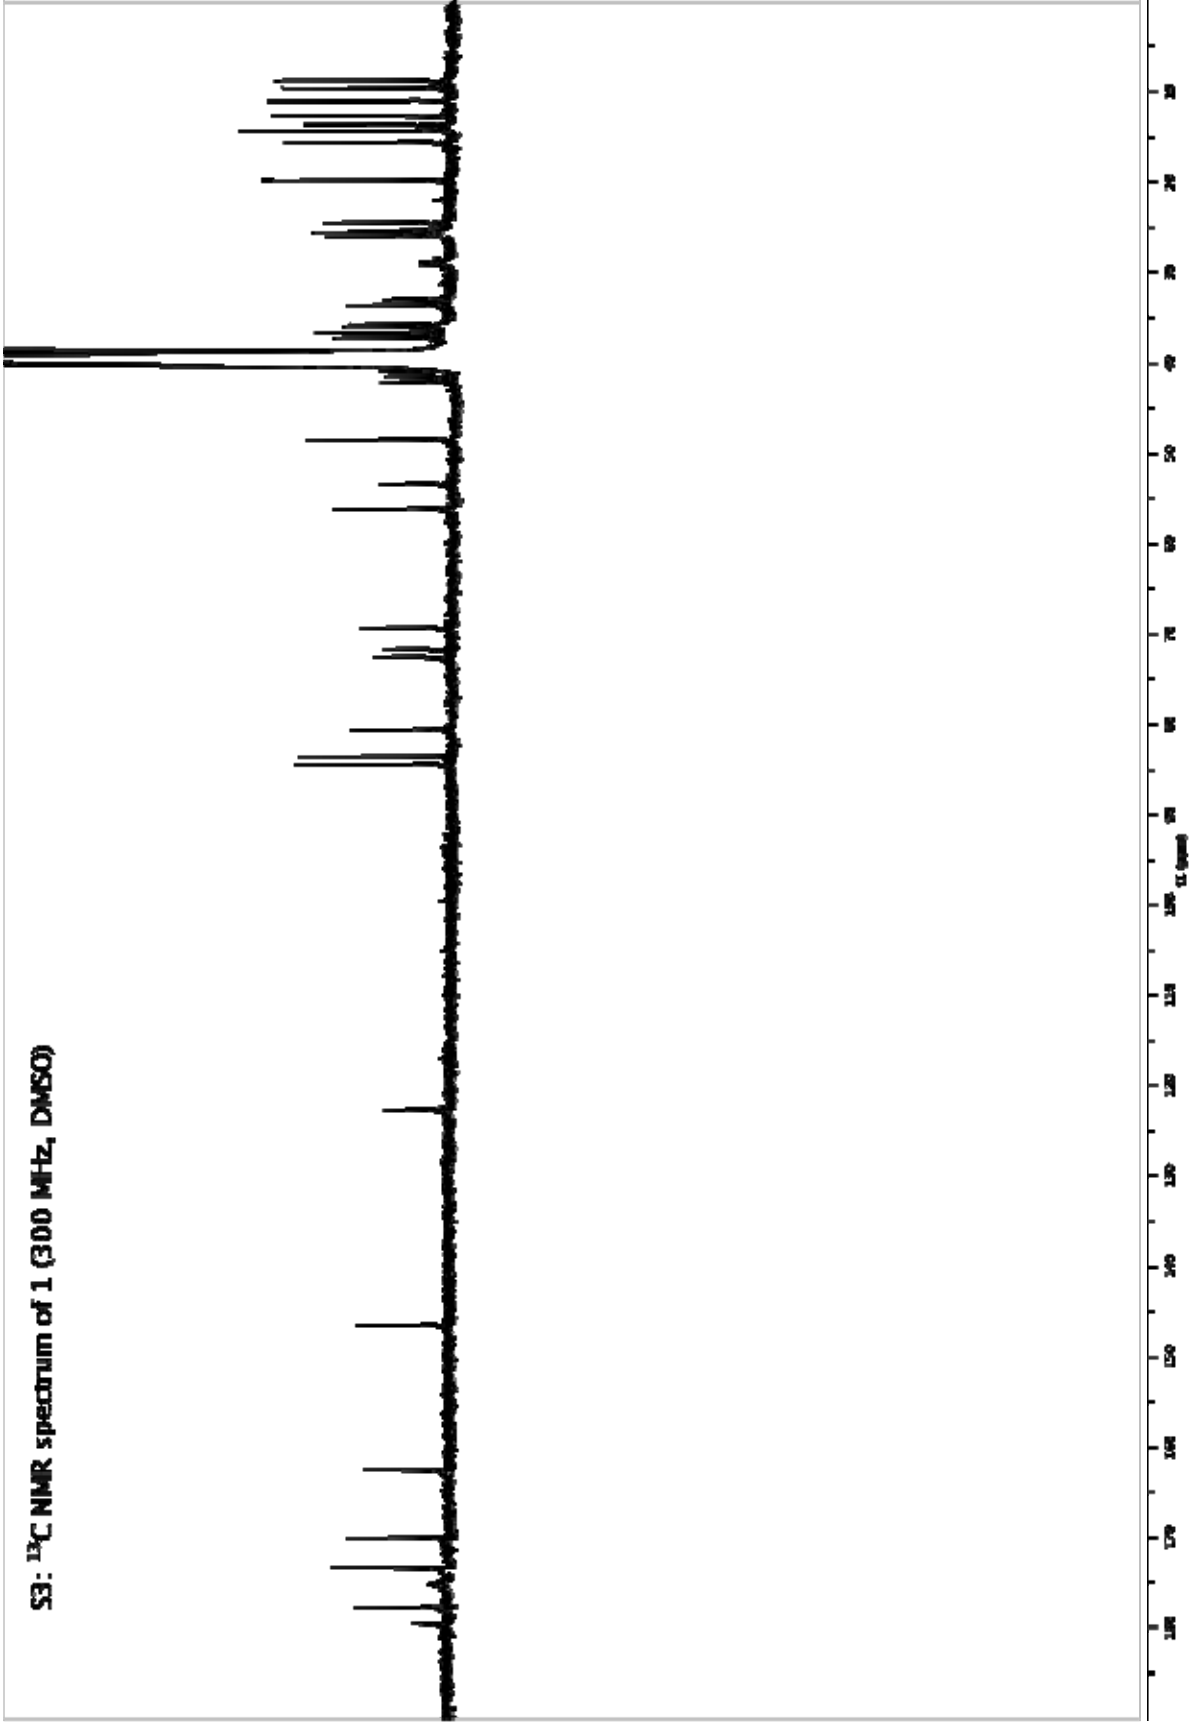

S4:  $^{13}\text{C}$  NMR spectrum of 2 (300 MHz, DMSO)

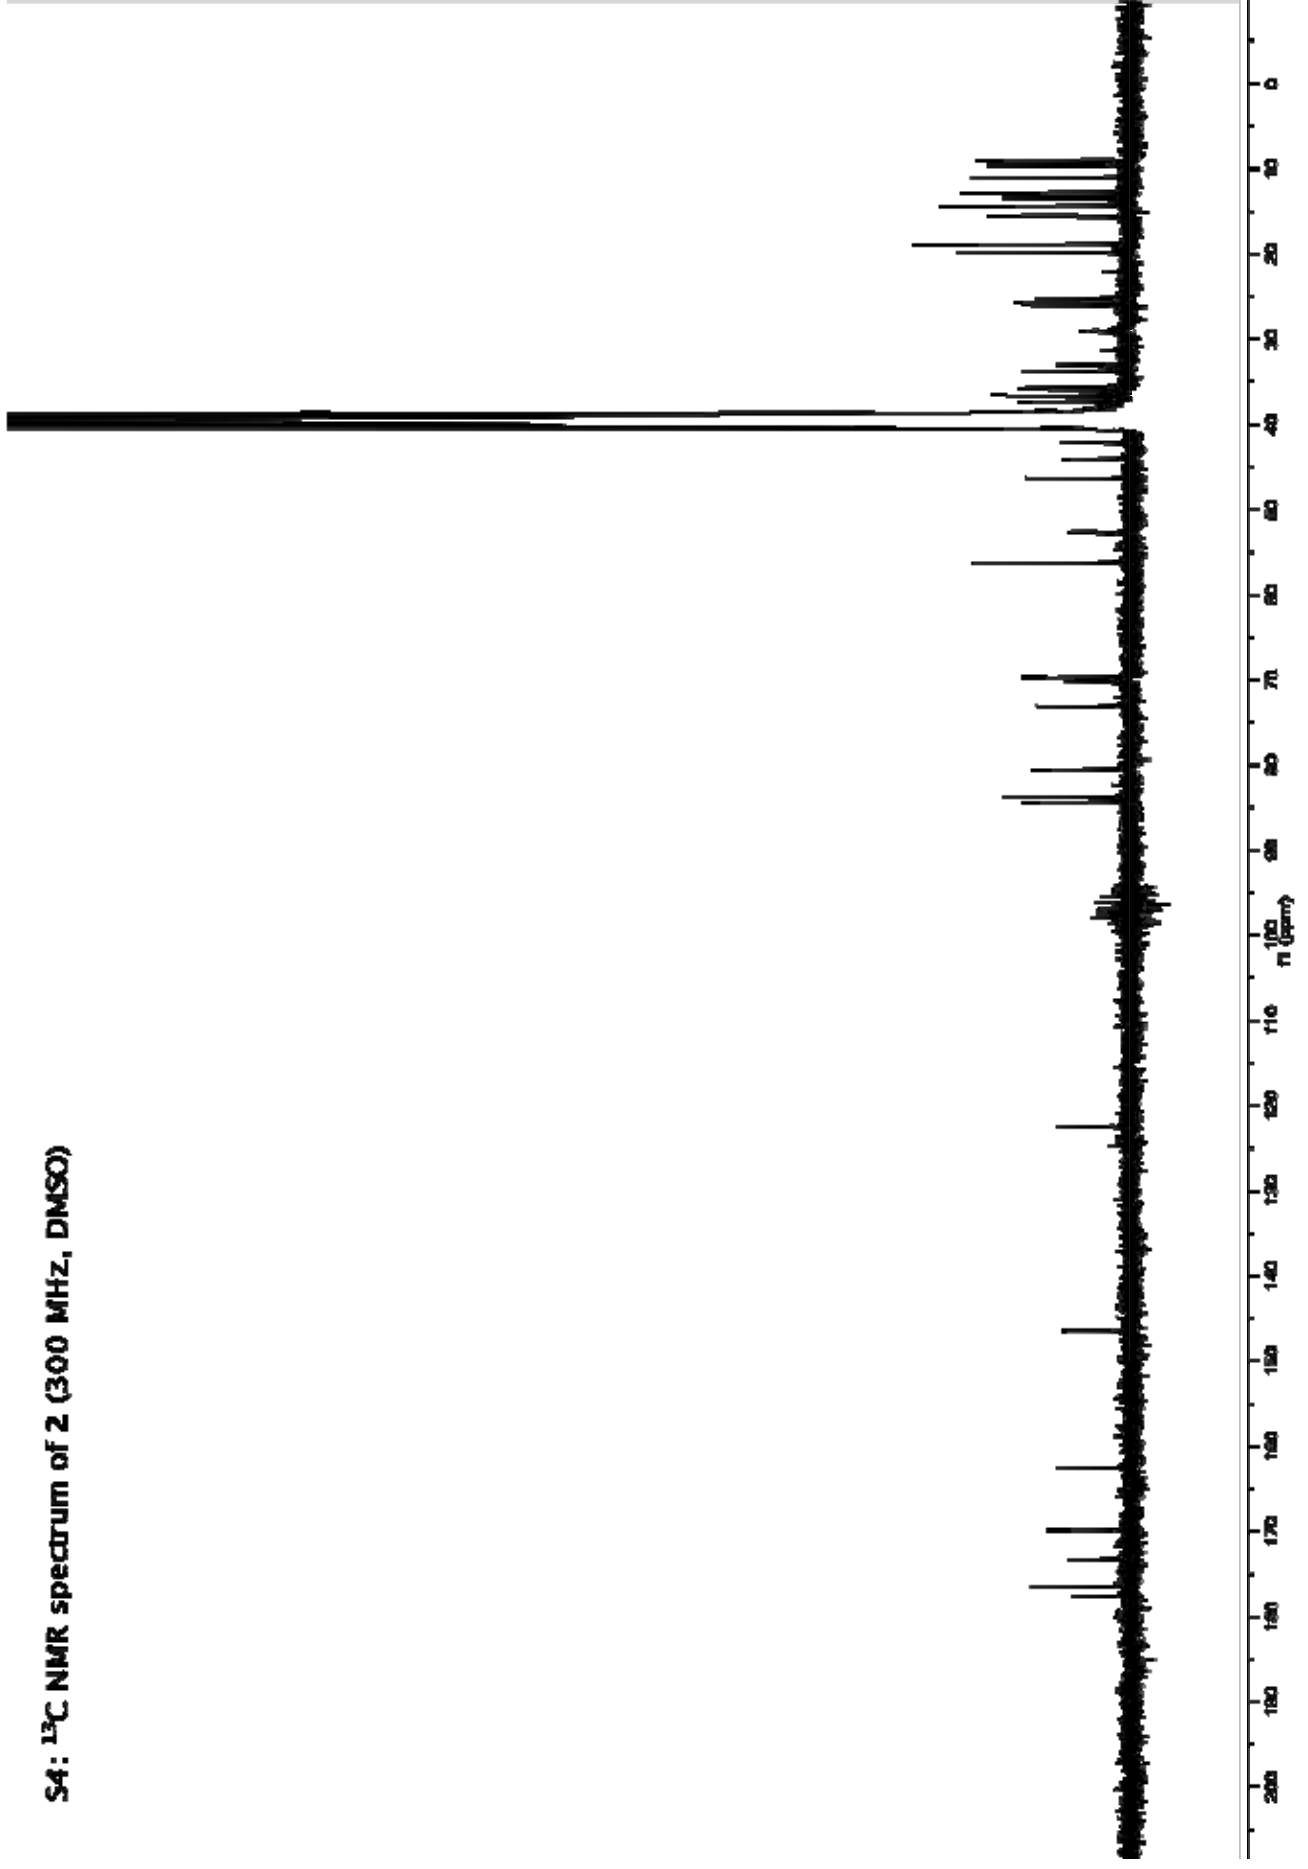

S5: COSY spectrum of 1 (500 MHz, DMSO)

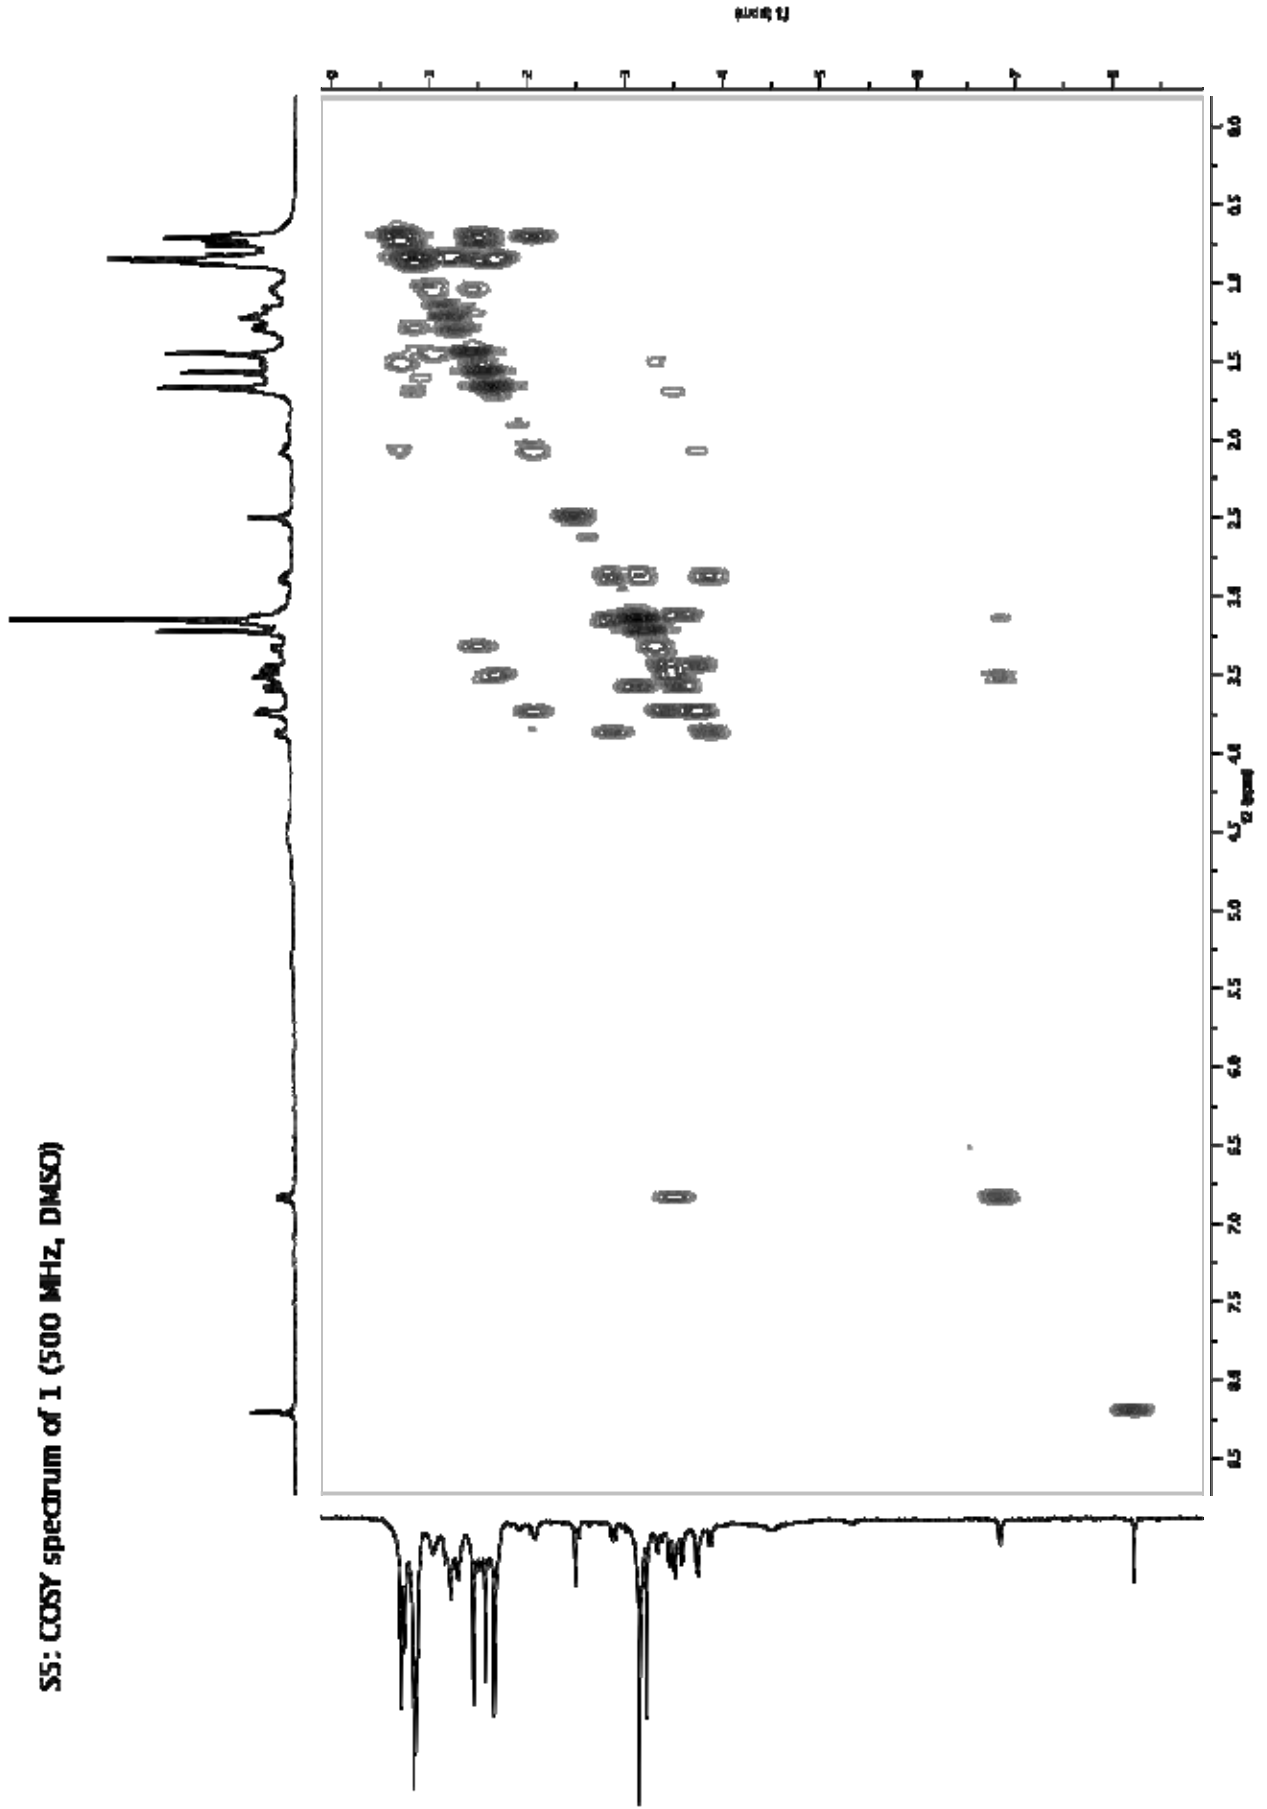

S6: COSY spectrum of 2 (600 MHz, DMSO)

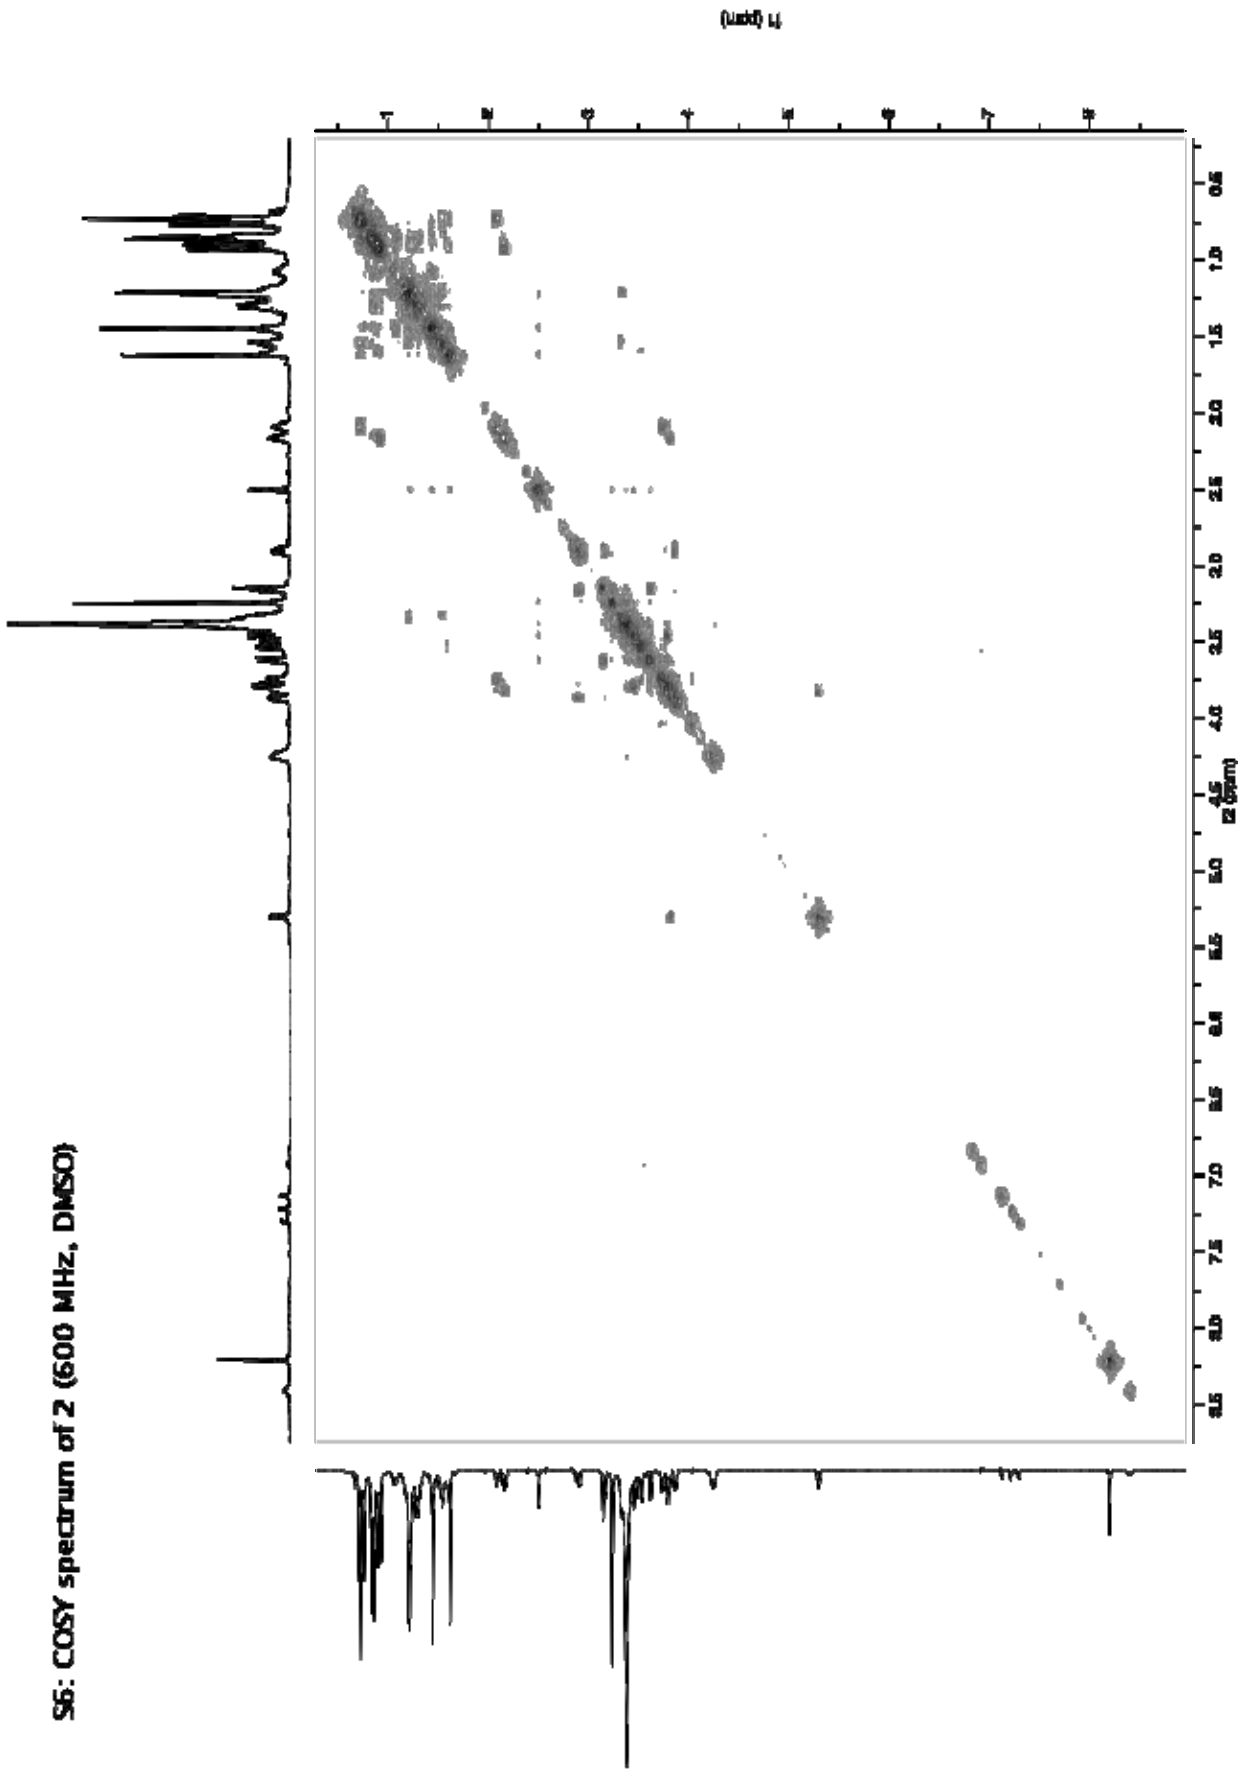



S7: TOCSY spectrum of 1 (500 MHz, DMSO)

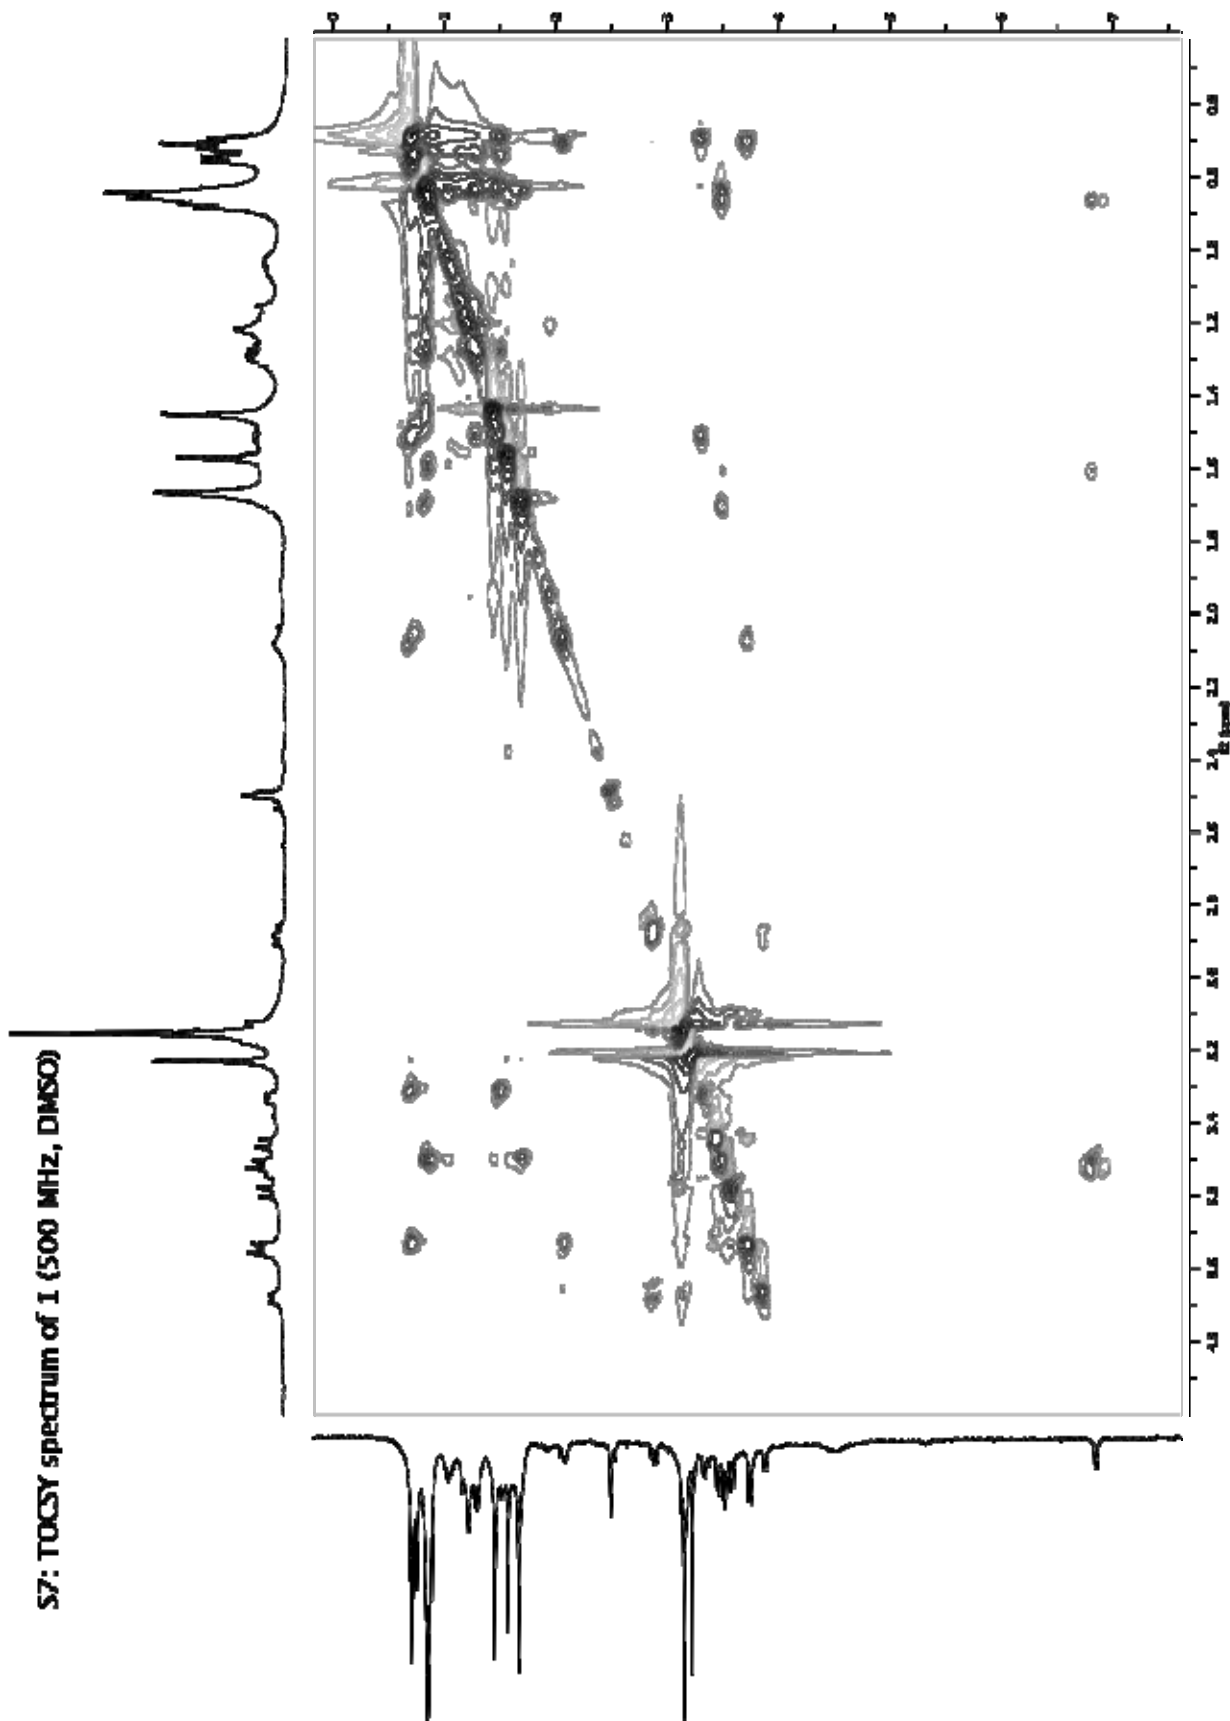

S8: TOCSY spectrum of 2 (600 MHz, DMSO)

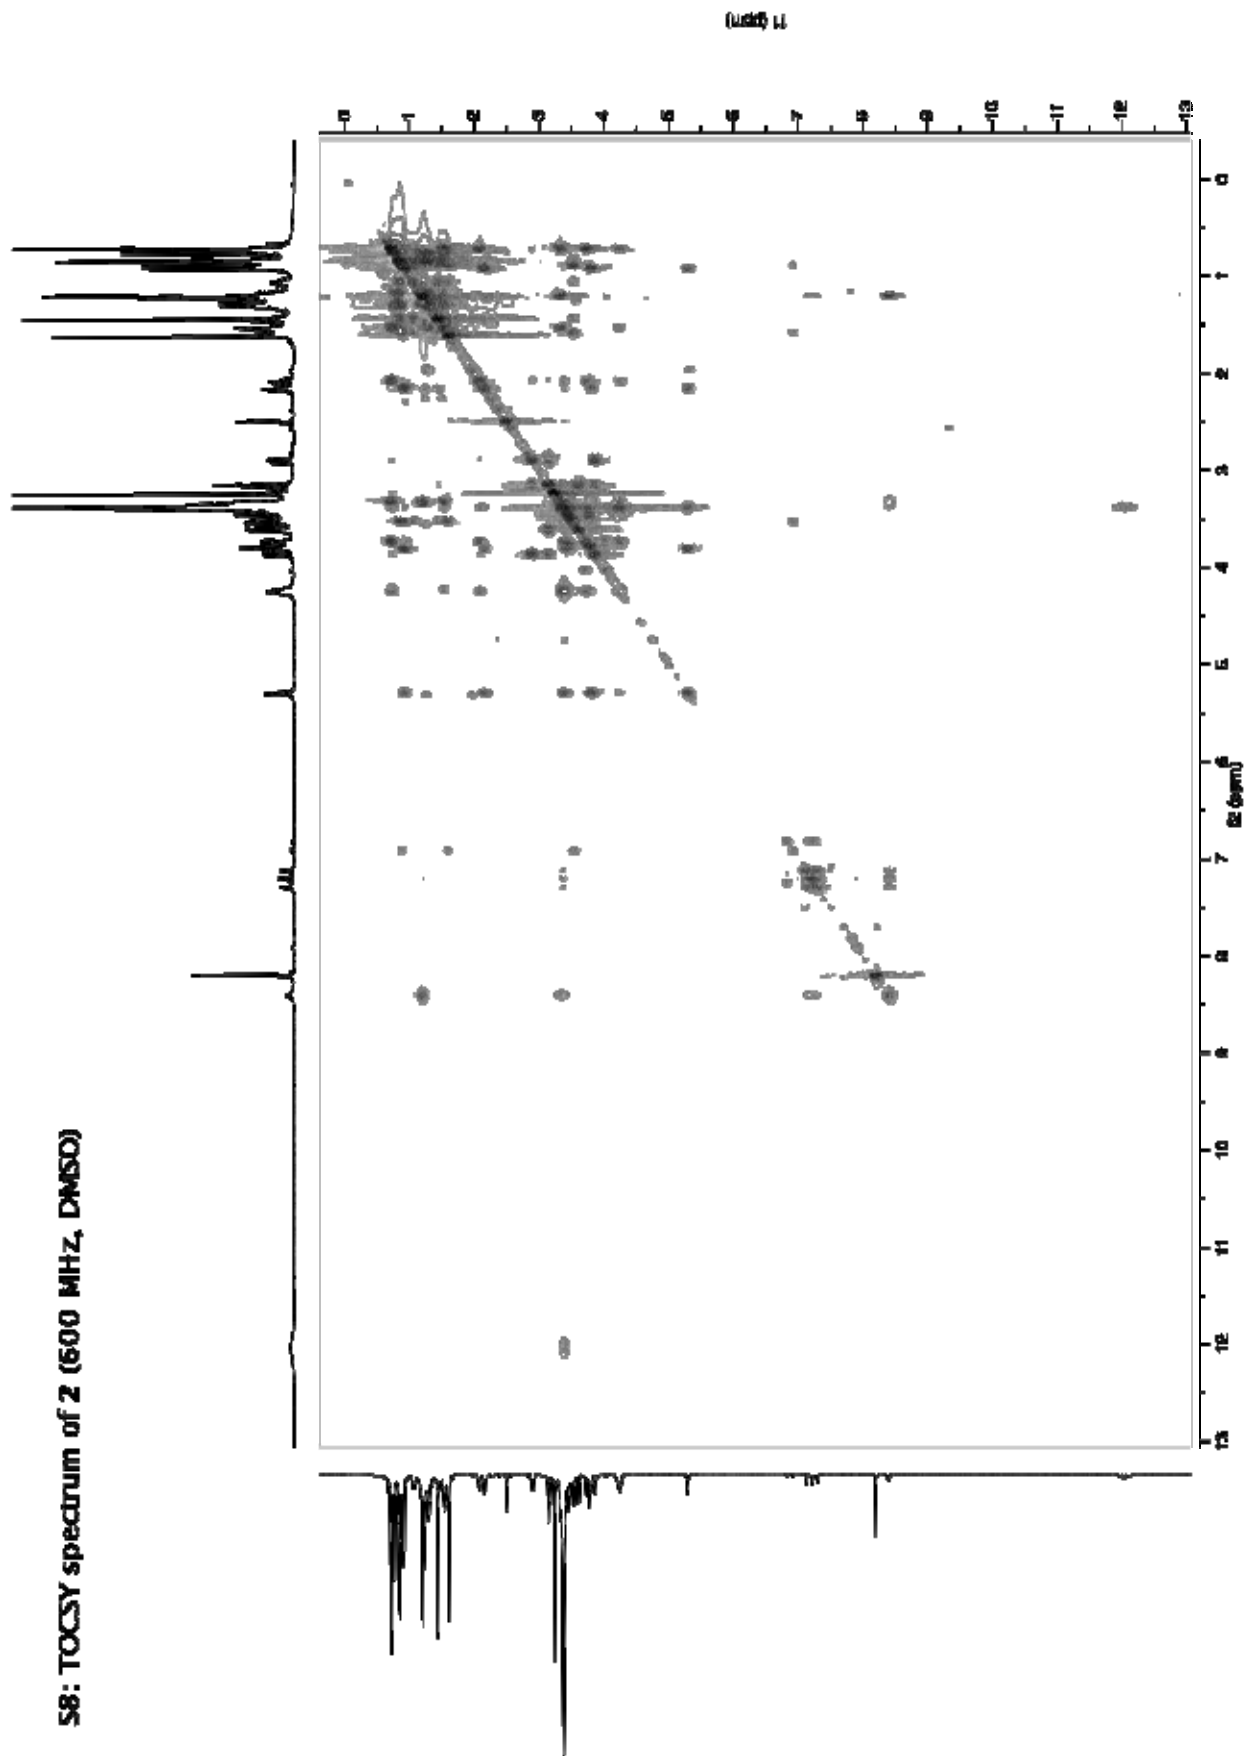

S9: HSQC spectrum of 1 (500 MHz, DMSO)

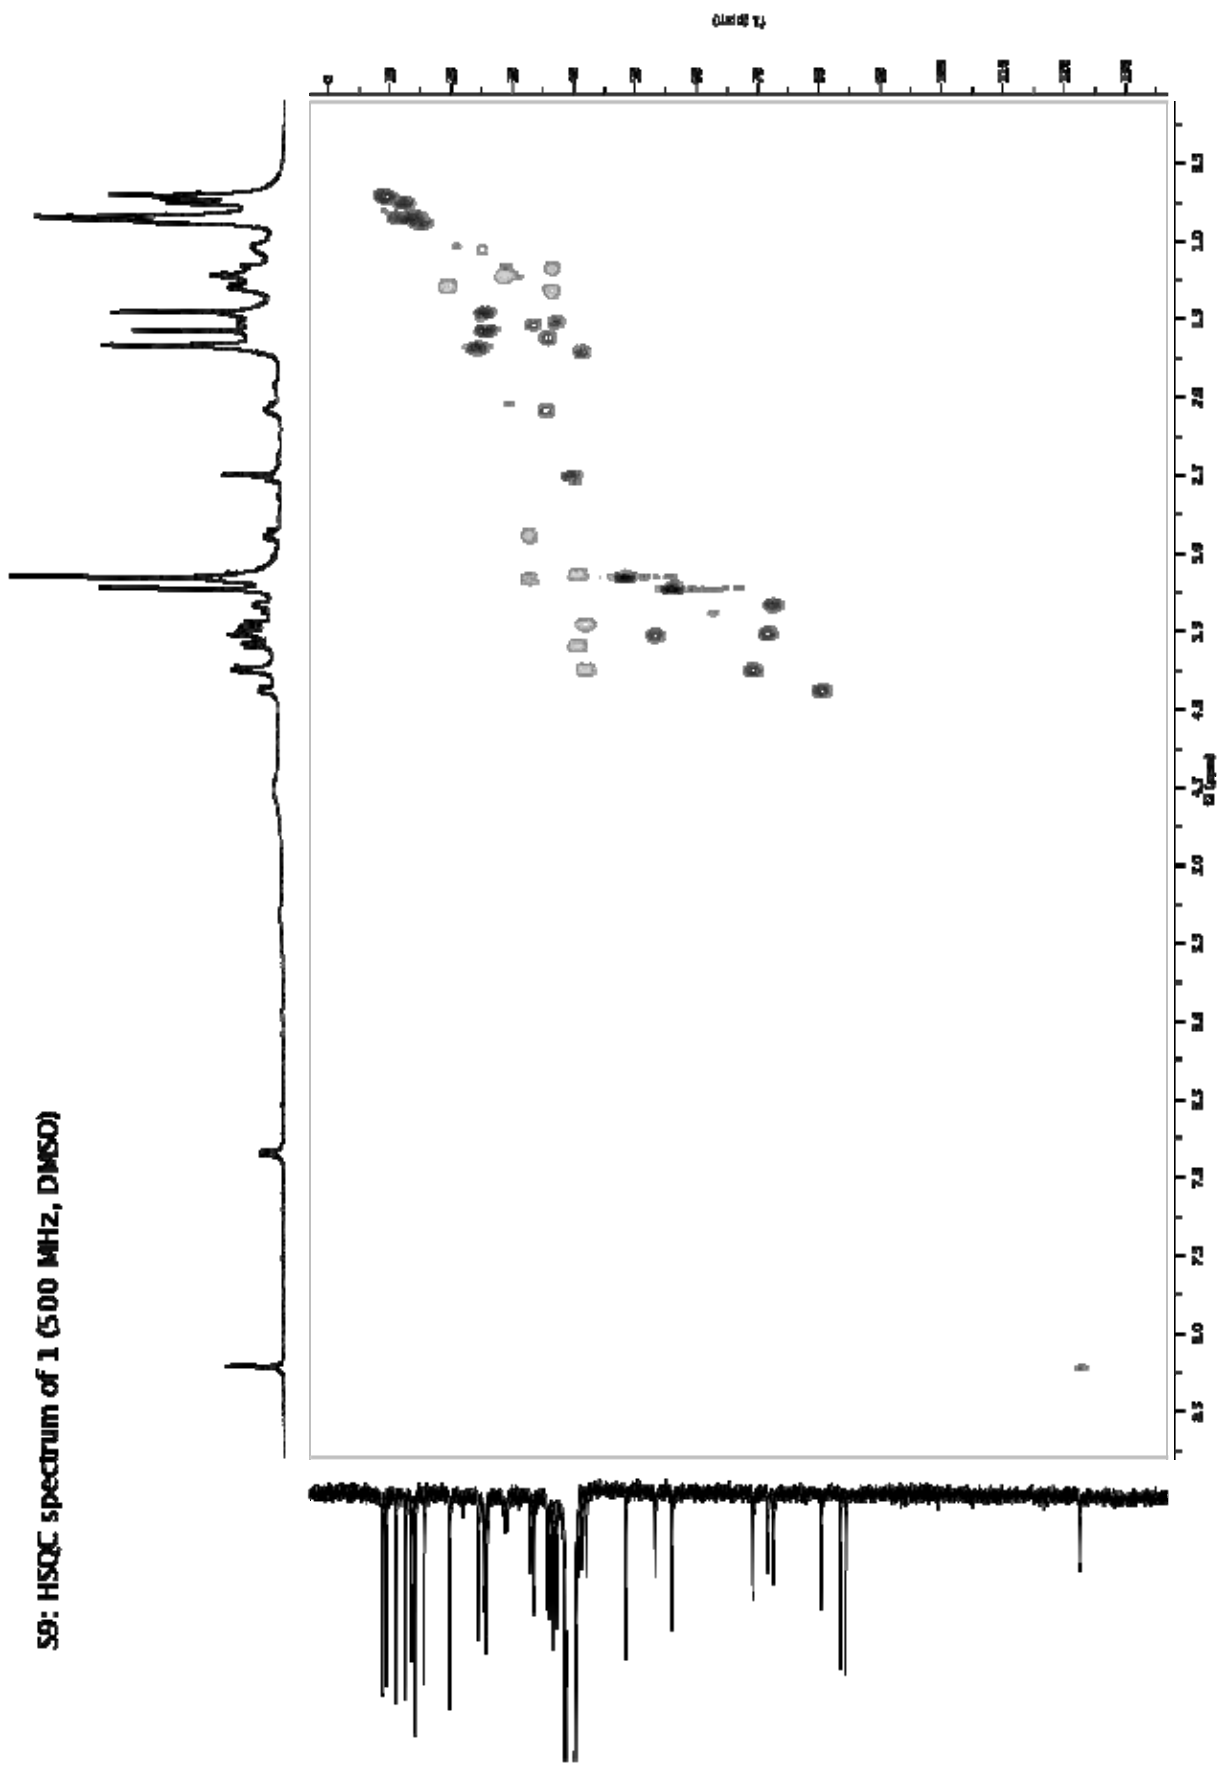

S10: HSQC spectrum of 2 (600 MHz, DMSO)

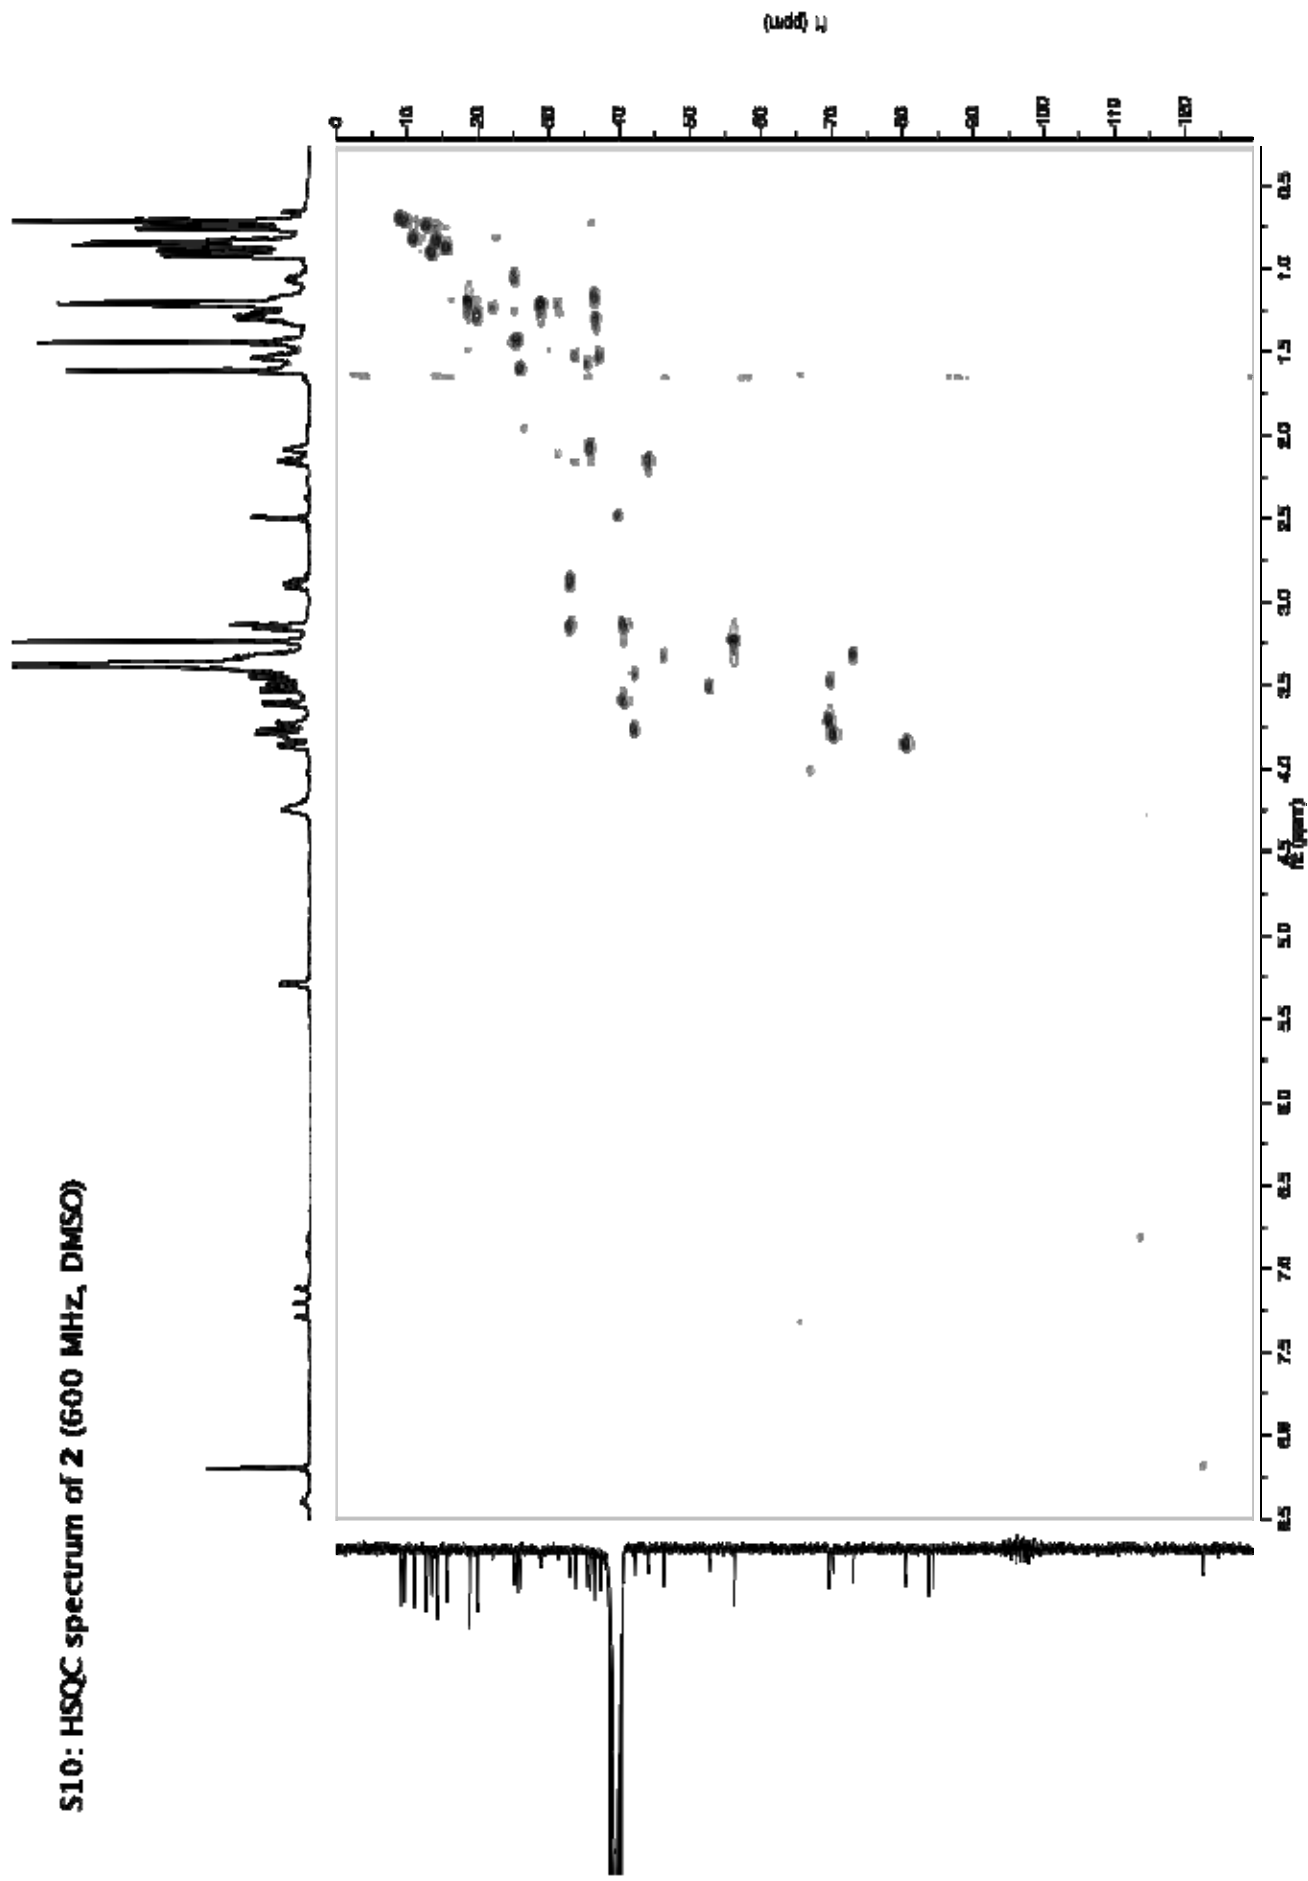

S1.1: HMBC spectrum of 1 (500 MHz, DMSO)

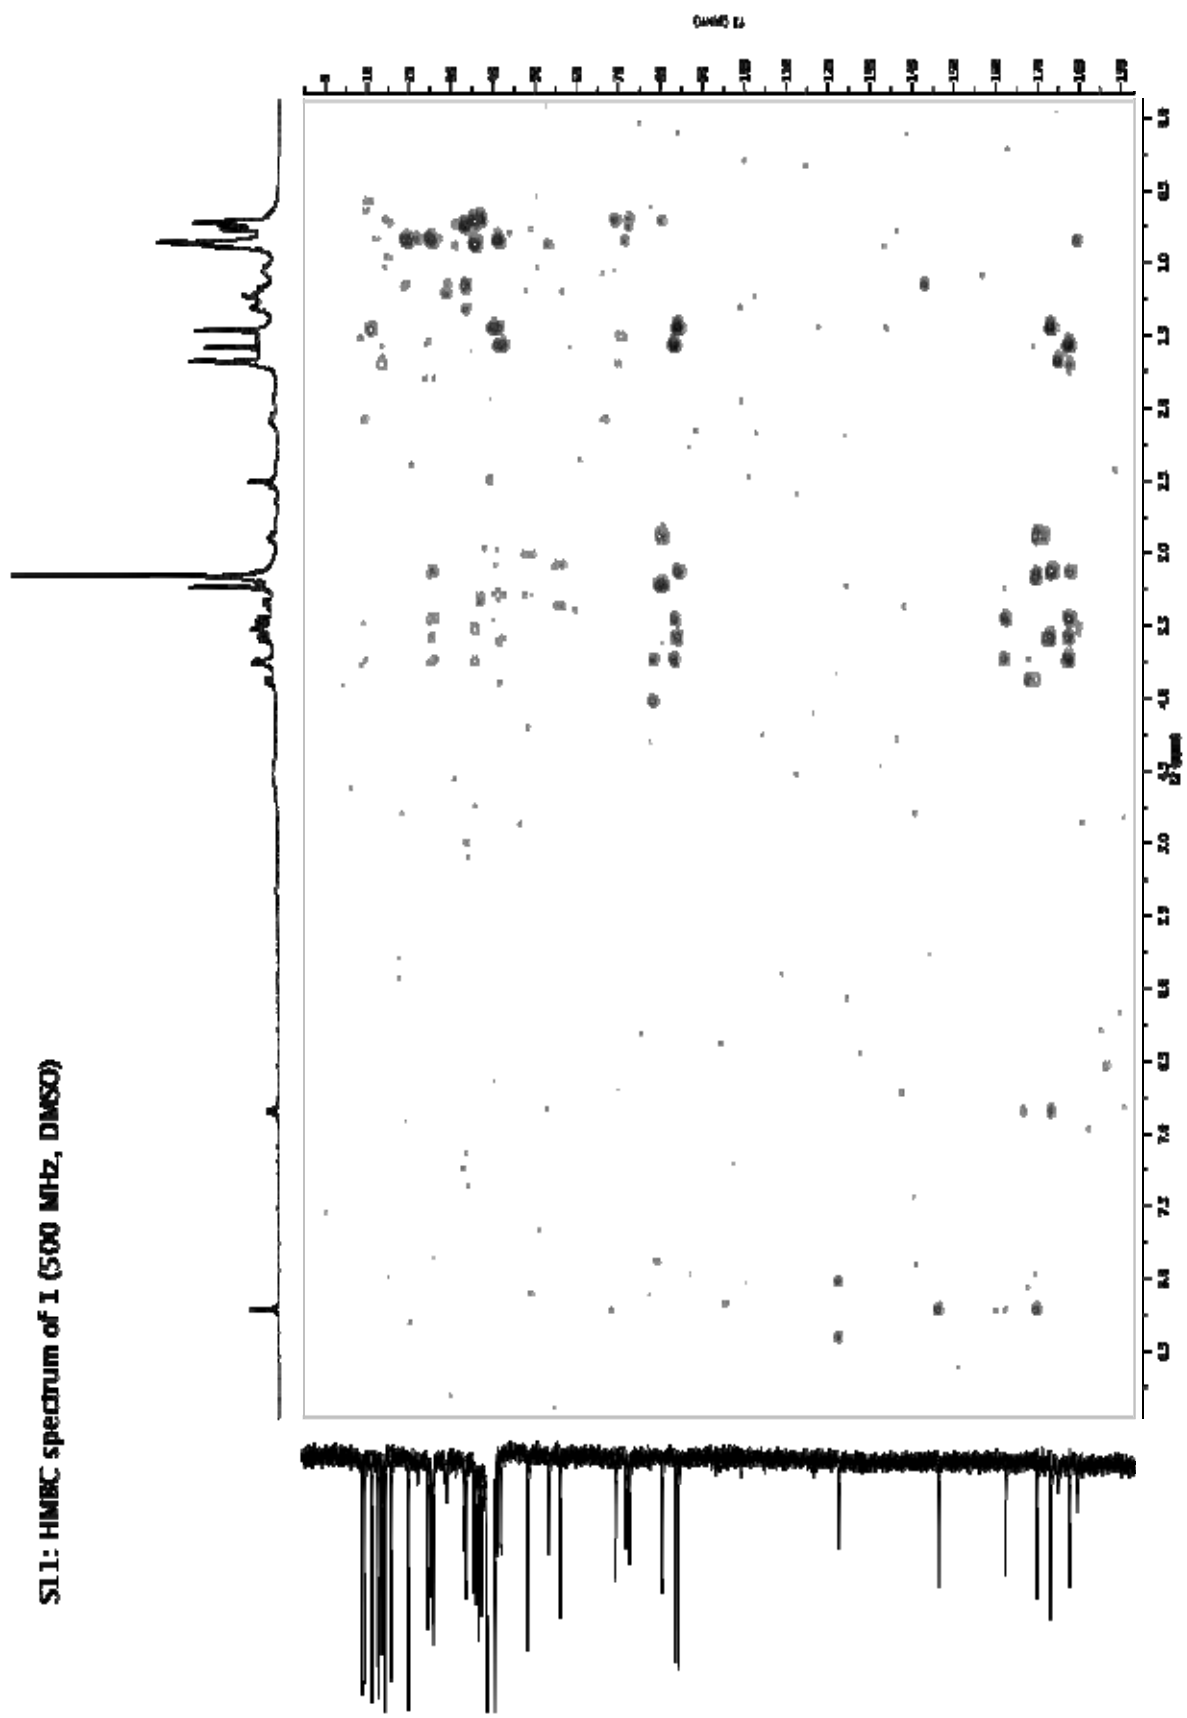

S12: HMBC spectrum of 2 (600 MHz, DMSO)

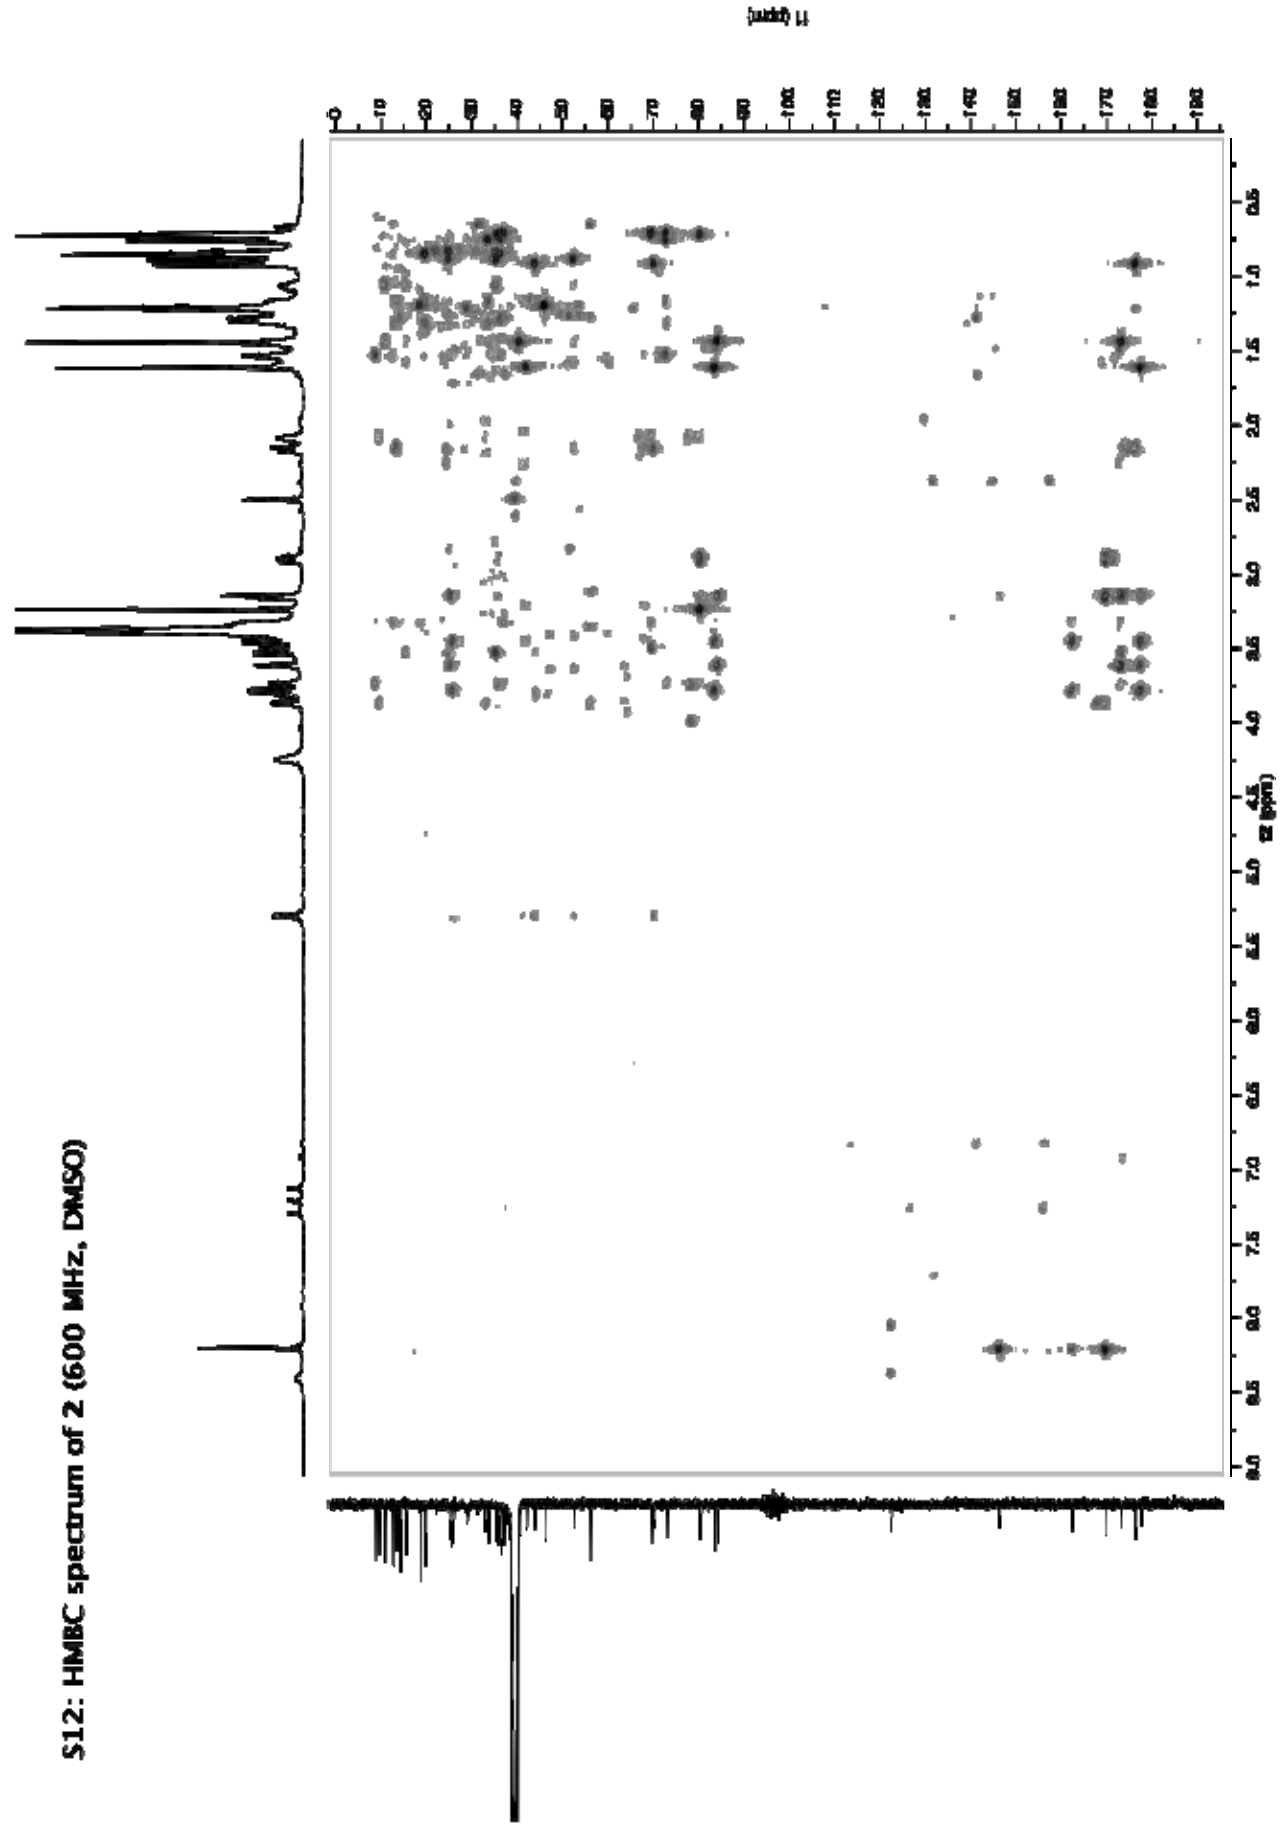

S13:  $^1\text{H}$  NMR spectrum of protonated **1** (500 MHz, DMSO)

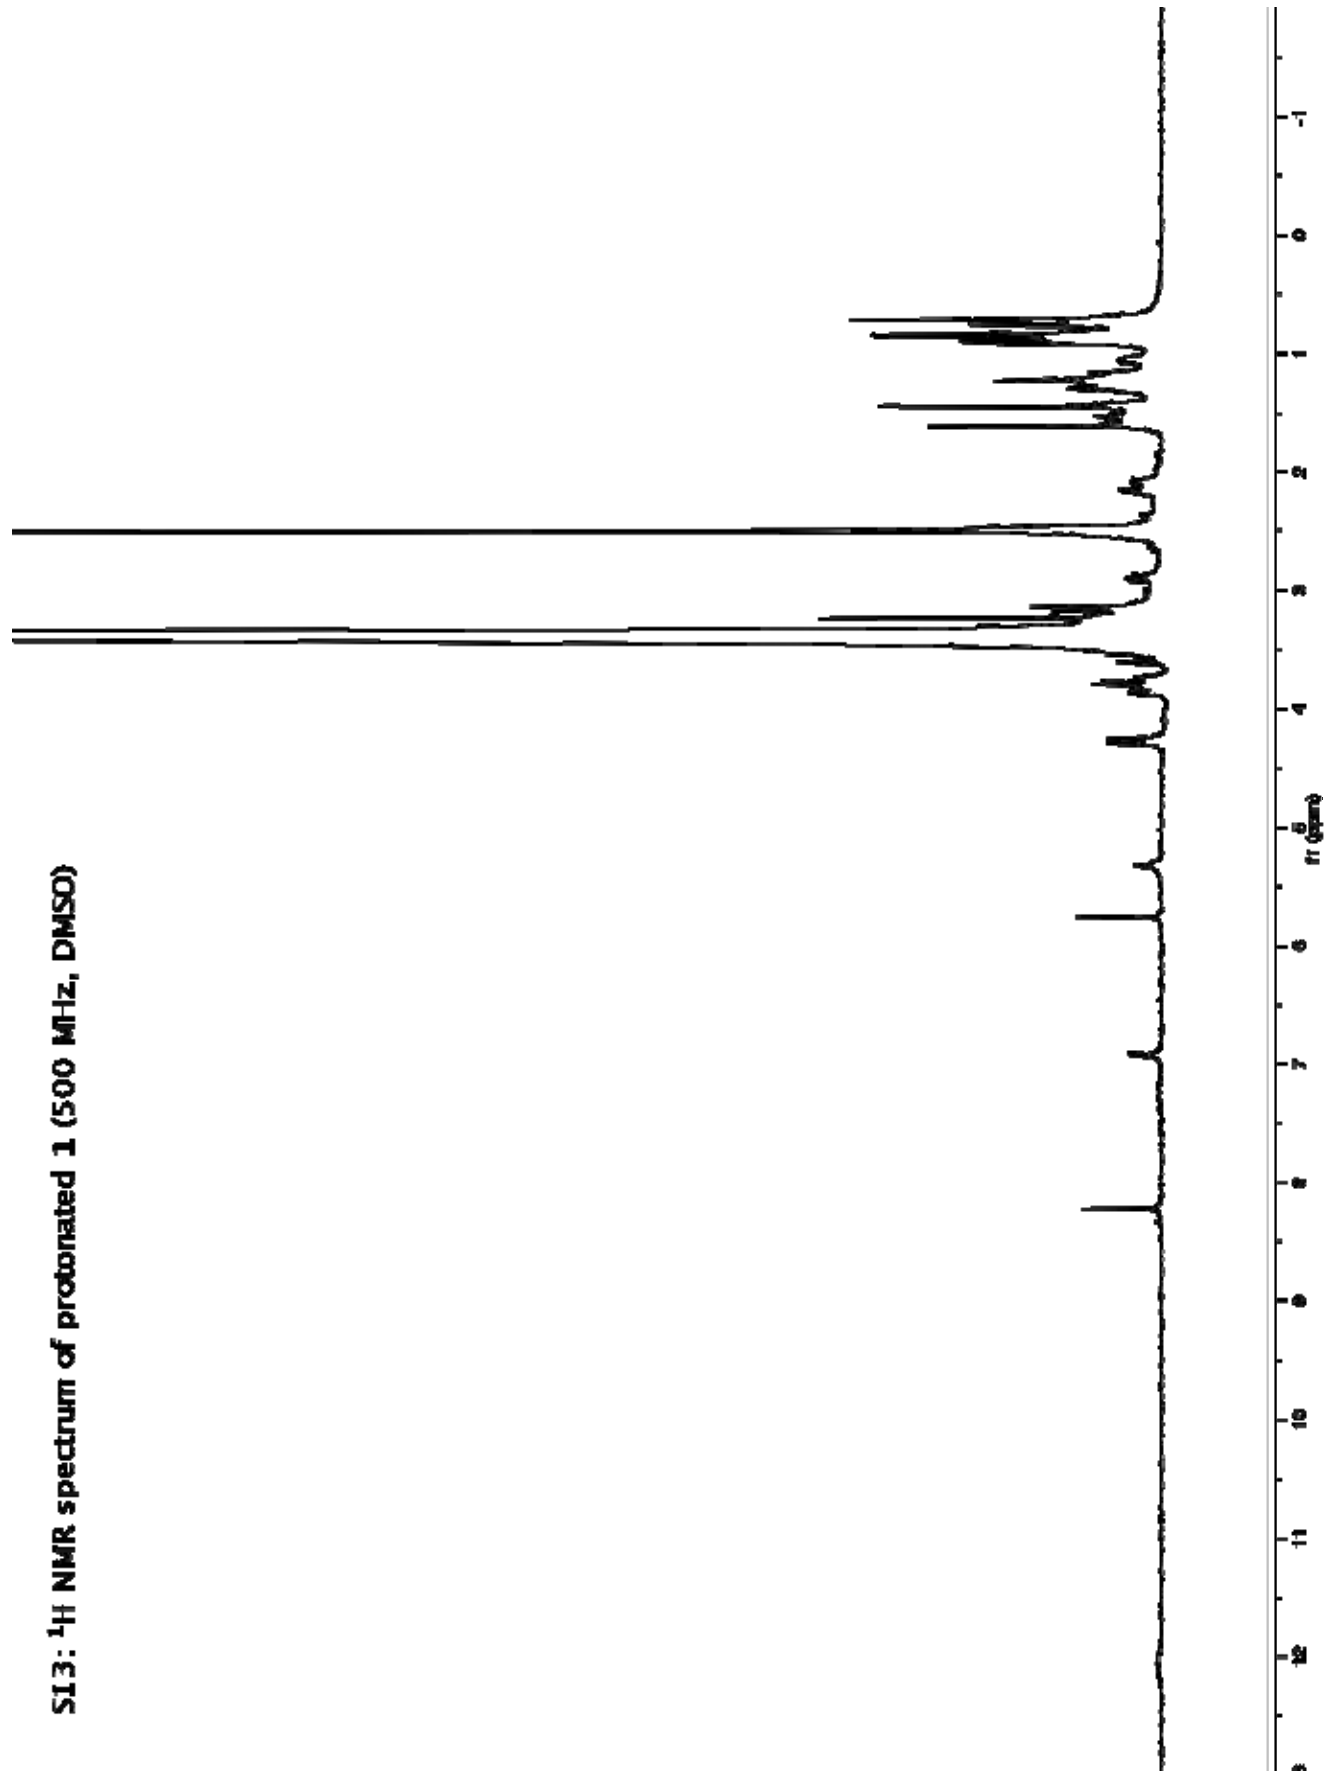

S14:  $^{13}\text{C}$  NMR spectrum of protonated **1** (300 MHz, DMSO)

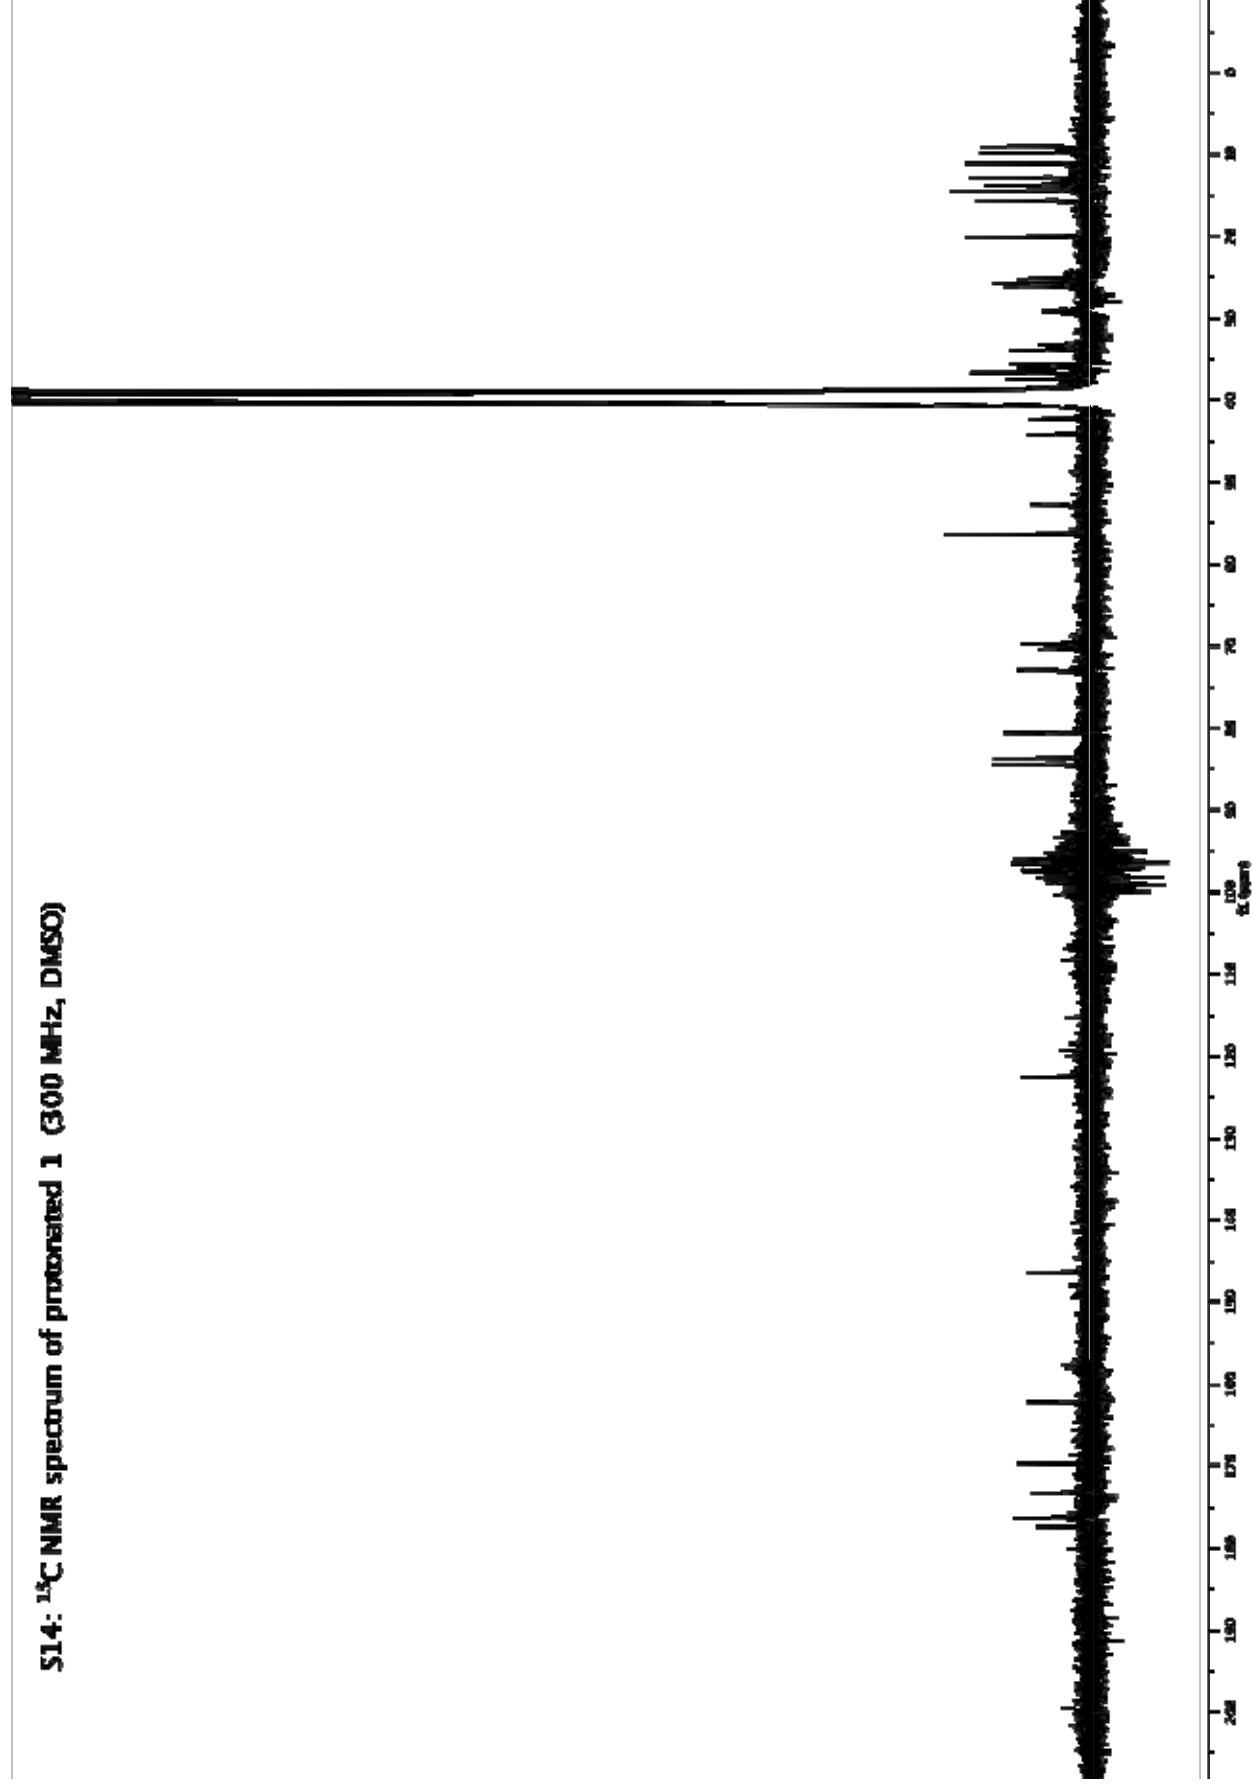



S15:  $^{13}\text{C}$  NMR spectrum of Holamide A hydrolysate (300 MHz, DMSO)

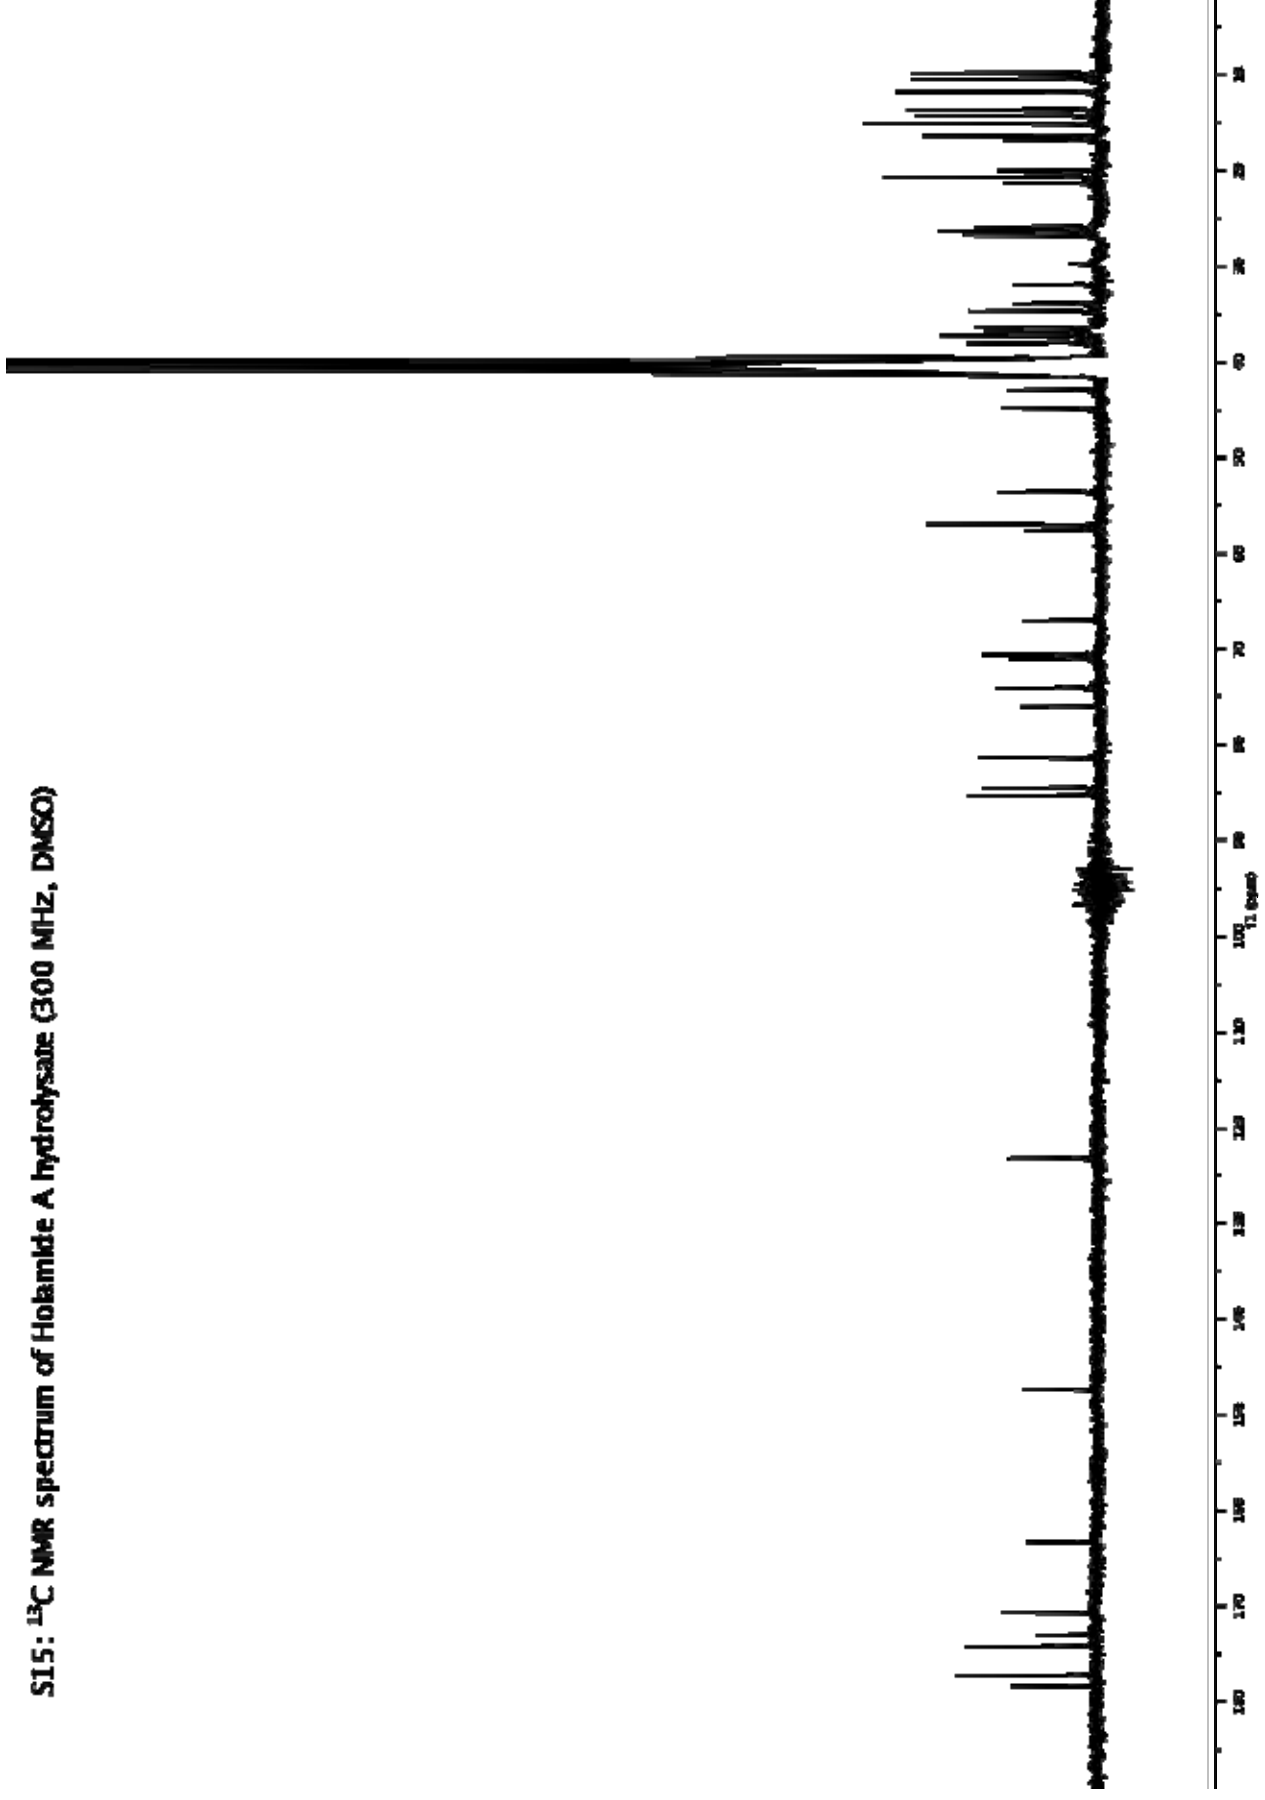

Supplement: NIHMS334775-supplement-01.pdf [file NIHMS334775-supplement-01.pdf]
